# Supplementary material
Source: PubMed Central journal article supplement (PMC5240044)

**Supplemental Figure S1.** Predicted morphine trough concentrations with different intermittent morphine doses given every 6 hours by birthweight. Each boxplot represents steady-state trough concentrations from 1000 simulated neonates with HIE receiving hypothermia. Outliers are not presented. Dashed lines reference target concentrations between 10 to 40 ng/ml.

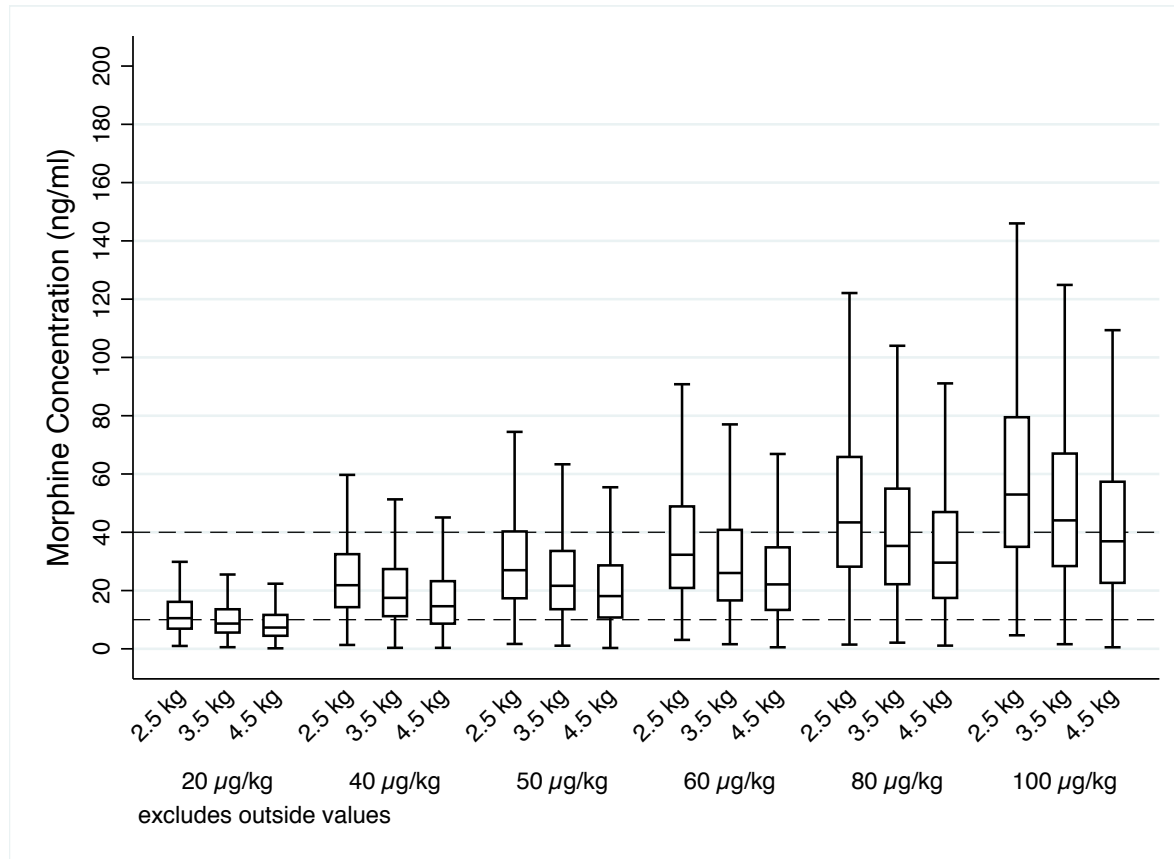

Supplement: NIHMS841368-supplement-Supplemental_Figure_S1.pdf [file NIHMS841368-supplement-Supplemental_Figure_S1.pdf]
